# Supplementary material for: Great Tit (Parus major) Uropygial Gland Microbiomes and Their Potential Defensive Roles
Source: Front Microbiol. 2020 Jul 28;11:1735. doi: 10.3389/fmicb.2020.01735 (PMC7401573; doi:10.3389/fmicb.2020.01735)
Supplement: Supplementary file 1 [file Table_1.xlsx]

## Sheet: Sheet1
GenBank Accession number	Host Species	Contry of the host	ID	Isolate number	Phylum	Genus	Most similar strain	Isolation source of the most similar strain	Similarity
MT276635	Parus major	Czech Republic	SO5	SO5_IS11	Actinobacteria	Curtobacterium	Curtobacterium flaccumfaciens strain BCCM/LMG 3645	Plant leaves	0.999	https://www.ncbi.nlm.nih.gov/nuccore/219878328
MT276620	Parus major	Czech Republic	WW1	WW1_IS10	Actinobacteria	Curtobacterium	Curtobacterium flaccumfaciens strain BCCM/LMG 3645	Plant leaves	0.998	https://www.ncbi.nlm.nih.gov/nuccore/219878328
MT276619	Parus major	Czech Republic	WW1	WW1_IS11	Actinobacteria	Curtobacterium	Curtobacterium oceanosedimentum strain ATCC 31317	Irish sea-sediment	0.992	https://www.ncbi.nlm.nih.gov/nuccore/NR_104839.1
MT276634	Parus major	Czech Republic	SO5	SO5_IS12	Actinobacteria	Dermacoccus	Dermacoccus barathri strain MT2.1	Deep-sea mud from the marianna trench	0.998	https://www.ncbi.nlm.nih.gov/nuccore/NR_043261.1
MT276650	Parus major	Czech Republic	MW2	MW2_IS4.1	Actinobacteria	Dermacoccus	Dermacoccus profundi strain MT2.2	Deep-sea mud from the marianna trench	0.997	https://www.ncbi.nlm.nih.gov/nuccore/NR_043262.1
MT276632	Parus major	Czech Republic	SO5	SO5_IS14	Actinobacteria	Dermacoccus	Dermacoccus profundi strain MT2.2	Deep-sea mud from the marianna trench	0.998	https://www.ncbi.nlm.nih.gov/nuccore/NR_043262.1
MT276630	Parus major	Czech Republic	SW2	SW2_IS1.3	Actinobacteria	Dermacoccus	Dermacoccus profundi strain MT2.2	Deep-sea mud from the marianna trench	0.998	https://www.ncbi.nlm.nih.gov/nuccore/NR_043262.1
MT276629	Parus major	Czech Republic	SW2	SW2_IS3	Actinobacteria	Dermacoccus	Dermacoccus profundi strain MT2.2	Deep-sea mud from the marianna trench	0.998	https://www.ncbi.nlm.nih.gov/nuccore/NR_043262.1
MT276627	Parus major	Czech Republic	WO3	WO3_IS1	Actinobacteria	Dermacoccus	Dermacoccus profundi strain MT2.2	Deep-sea mud from the marianna trench	0.999	https://www.ncbi.nlm.nih.gov/nuccore/NR_043262.1
MT276646	Parus major	Czech Republic	SO1	SO1_IS13	Actinobacteria	Dermacoccus	Dermacoccus profundi strain MT2.2	Deep-sea mud from the marianna trench	0.999	https://www.ncbi.nlm.nih.gov/nuccore/NR_043262.1
MT276645	Parus major	Czech Republic	SO1	SO1_IS14	Actinobacteria	Dermacoccus	Dermacoccus profundi strain MT2.2	Deep-sea mud from the marianna trench	0.998	https://www.ncbi.nlm.nih.gov/nuccore/NR_043262.1
MT276665	Parus major	Denmark	GT1	GT1_IS4	Actinobacteria	Frigoribacterium	Frigoribacterium faeni strain 801	Airborn dust in a cattle barn	0.994	https://www.ncbi.nlm.nih.gov/nuccore/NR_026511.1
MT276664	Parus major	Denmark	GT1	GT1_IS5	Actinobacteria	FrigoriBacterium	Frigoribacterium faeni strain 801	Airborn dust in a cattle barn	0.997	https://www.ncbi.nlm.nih.gov/nuccore/NR_026511.1
MT276666	Parus major	Denmark	GT1	GT1_IS1	Actinobacteria	FrigoriBacterium	Frigoribacterium faeni strain 801	Airborn dust in a cattle barn	0.997	https://www.ncbi.nlm.nih.gov/nuccore/NR_026511.1
MT276636	Parus major	Czech Republic	SO5	SO5_IS10	Actinobacteria	Kocuria	Kocuria marina strain KMM 3905	Marine sediment	0.996	https://www.ncbi.nlm.nih.gov/nuccore/NR_025723.1
MT276652	Parus major	Czech Republic	MW2	MW2_IS2	Actinobacteria	Kocuria	Kocuria rhizophila strain TA68	Rhizoplane of Typha angustifolia	0.999	https://www.ncbi.nlm.nih.gov/nuccore/NR_026452.1
MT276625	Parus major	Czech Republic	WO4	WO4_IS10	Actinobacteria	Kocuria	Kocuria salsiccia strain 104	Salt-fermented seafood	0.999	https://www.ncbi.nlm.nih.gov/nuccore/NR_117299.1
MT276624	Parus major	Czech Republic	WO5	WO5_IS2	Actinobacteria	Kocuria	Kocuria salsiccia strain 104	Salt-fermented seafood	0.999	https://www.ncbi.nlm.nih.gov/nuccore/NR_117299.1
MT276648	Parus major	Czech Republic	SO1	SO1_IS10	Actinobacteria	Kocuria	Kocuria salsiccia strain 104	Salt-fermented seafood	1.999	https://www.ncbi.nlm.nih.gov/nuccore/NR_117299.2
MT276649	Parus major	Czech Republic	MW2	MW2_IS5	Firmicutes	Bacillus	Bacillus aerius strain 24K	Isolated from cryogenic tubes	0.999	https://www.ncbi.nlm.nih.gov/nuccore/NR_042338.1
MT276663	Parus major	Denmark	GT4	GT4_IS1	Firmicutes	Bacillus	Bacillus pumilus strain NBRC 12092	spacecraft and assembly-facility surfaces	0.996	https://www.ncbi.nlm.nih.gov/nuccore/NR_043242.1
MT276653	Parus major	Czech Republic	MW2	MW2_IS1	Firmicutes	Bacillus	Bacillus subtilis strain SBMP4	?	0.999	https://www.ncbi.nlm.nih.gov/nuccore/NR_112116.2
MT276655	Parus major	Czech Republic	MO5	MO5_IS10	Firmicutes	Enterococcus	Enterococcus durans strain NBRC 100479	Dried milk	0.999	https://www.ncbi.nlm.nih.gov/nuccore/NR_036922.1
MT276662	Parus major	Czech Republic	MO1	MO1_IS10	Firmicutes	Exiguobacterium	Exiguobacterium indicum strain HHS 31	Hamta glacier, Himalayas	0.999	https://www.ncbi.nlm.nih.gov/nuccore/NR_042347.1
MT276641	Parus major	Czech Republic	SO3	SO3_IS13	Firmicutes	Lactococcus	Lactococcus lactis strain NBRC 100933	?	0.999	https://www.ncbi.nlm.nih.gov/nuccore/NR_040954.1
MT276640	Parus major	Czech Republic	SO4	SO4_IS10	Firmicutes	Lactococcus	Lactococcus lactis strain NBRC 100933	?	0.999	https://www.ncbi.nlm.nih.gov/nuccore/NR_040954.1
MT276639	Parus major	Czech Republic	SO4	SO4_IS11	Firmicutes	Lactococcus	Lactococcus lactis strain NBRC 100933	?	0.998	https://www.ncbi.nlm.nih.gov/nuccore/NR_040954.1
MT276633	Parus major	Czech Republic	SO5	SO5_IS13	Firmicutes	Lactococcus	Lactococcus lactis strain NBRC 100933	?	0.999	https://www.ncbi.nlm.nih.gov/nuccore/NR_040954.1
MT276626	Parus major	Czech Republic	WO3	WO3_IS10	Firmicutes	Lactococcus	Lactococcus lactis strain NBRC 100933	?	0.999	https://www.ncbi.nlm.nih.gov/nuccore/NR_040954.1
MT276623	Parus major	Czech Republic	WO5	WO5_IS10	Firmicutes	Lactococcus	Lactococcus lactis subsp. tructae strain L105	Intestinal mucus of brown trout	0.999	https://www.ncbi.nlm.nih.gov/nuccore/NR_116443.1
MT276622	Parus major	Czech Republic	WO5	WO5_IS11	Firmicutes	Lactococcus	Lactococcus lactis subsp. tructae strain L105	Intestinal mucus of brown trout	0.998	https://www.ncbi.nlm.nih.gov/nuccore/NR_116443.1
MT276654	Parus major	Czech Republic	MW1	MW1_IS10	Firmicutes	Leuconostoc	Leuconostoc lactis KCTC 3528 = DSM 20202 strain JCM 6123	Milk	0.999	https://www.ncbi.nlm.nih.gov/nuccore/NR_113255.1
MT276651	Parus major	Czech Republic	MW2	MW2_IS3	Firmicutes	Staphylococcus	Staphylococcus cohnii strain GH 137	Human skin	0.999	https://www.ncbi.nlm.nih.gov/nuccore/310975038
MT276659	Parus major	Czech Republic	MO2	MO2_IS11	Firmicutes	Staphylococcus	Staphylococcus epidermidis strain NBRC 100911	Nose	0.997	https://www.ncbi.nlm.nih.gov/nuccore/NR_036904.1
MT276656	Parus major	Czech Republic	MO4	MO4_IS13	Firmicutes	Staphylococcus	Staphylococcus epidermidis strain NBRC 100911	Nose	0.998	https://www.ncbi.nlm.nih.gov/nuccore/NR_036904.1
MT276642	Parus major	Czech Republic	SO3	SO3_IS12	Firmicutes	Staphylococcus	Staphylococcus epidermidis strain NBRC 100911	Nose	0.997	https://www.ncbi.nlm.nih.gov/nuccore/NR_036904.1
MT276660	Parus major	Czech Republic	MO2	MO2_IS10	Firmicutes	Staphylococcus	Staphylococcus equorum strain PA 231	Horse skin	0.998	https://www.ncbi.nlm.nih.gov/nuccore/NR_027520.1
MT276647	Parus major	Czech Republic	SO1	SO1_IS11	Firmicutes	Staphylococcus	Staphylococcus haemolyticus strain JCM 2416	?	0.998	https://www.ncbi.nlm.nih.gov/nuccore/NR_036955.1
MT276644	Parus major	Czech Republic	SO3	SO3_IS1	Firmicutes	Staphylococcus	Staphylococcus haemolyticus strain JCM 2416	?	0.997	https://www.ncbi.nlm.nih.gov/nuccore/NR_036955.1
MT276628	Parus major	Czech Republic	WO1	WO1_IS10	Firmicutes	Staphylococcus	Staphylococcus haemolyticus strain JCM 2416	?	0.998	https://www.ncbi.nlm.nih.gov/nuccore/NR_036955.1
MT276657	Parus major	Czech Republic	MO4	MO4_IS12	Firmicutes	Staphylococcus	Staphylococcus pasteuri strain ATCC 51129	Human vomit, France	0.998	https://www.ncbi.nlm.nih.gov/nuccore/NR_024669.1
MT276631	Parus major	Czech Republic	SW1	SW1_IS2	Firmicutes	Staphylococcus	Staphylococcus pasteuri strain ATCC 51129	Human vomit, France	0.998	https://www.ncbi.nlm.nih.gov/nuccore/NR_024669.1
MT276621	Parus major	Czech Republic	WO5	WO5_IS12	Firmicutes	Staphylococcus	Staphylococcus pasteuri strain ATCC 51129	Human vomit, France	1	https://www.ncbi.nlm.nih.gov/nuccore/NR_024669.1
MT276661	Parus major	Czech Republic	MO1	MO1_IS11	Firmicutes	Staphylococcus	Staphylococcus warneri strain AW 25	Human skin	0.999	https://www.ncbi.nlm.nih.gov/nuccore/NR_025922.1
MT276658	Parus major	Czech Republic	MO4	MO4_IS10	Firmicutes	Staphylococcus	Staphylococcus warneri strain AW 25	Human skin	0.997	https://www.ncbi.nlm.nih.gov/nuccore/NR_025922.1
MT276643	Parus major	Czech Republic	SO3	SO3_IS10	Firmicutes	Staphylococcus	Staphylococcus pasteuri strain ATCC 51129	Human vomit, France	1	https://www.ncbi.nlm.nih.gov/nuccore/NR_024669.1
MT276637	Parus major	Czech Republic	SO4	SO4_IS14	Firmicutes	Weissella	Weissella soli strain Mi268	Soil	0.998	https://www.ncbi.nlm.nih.gov/nuccore/NR_025642.1
MT276638	Parus major	Czech Republic	SO4	SO4_IS13	Proteobacteria	Moraxella	Moraxella osloensis strain A1920	Cerebrospinal fluid, human	0.995	https://www.ncbi.nlm.nih.gov/nuccore/NR_104936.1
